# Supplementary material for: Evolution of intron splicing towards optimized gene expression is based on various Cis- and Trans-molecular mechanisms
Source: PubMed Central journal article supplement (PMC6728054; doi:10.1371/journal.pbio.3000423), 2019-08-23

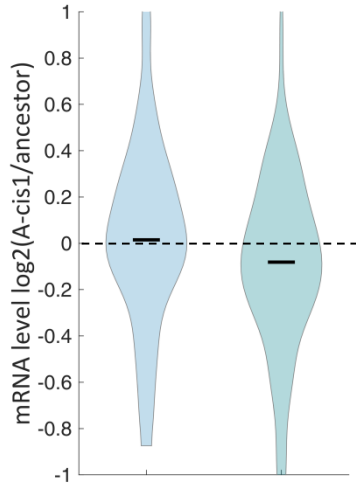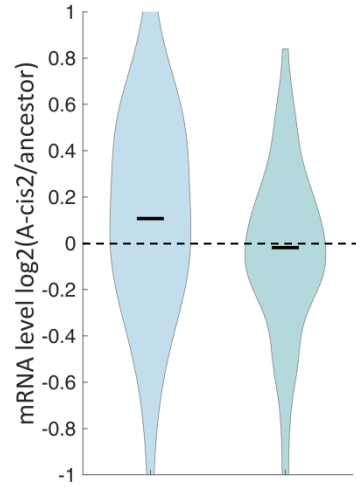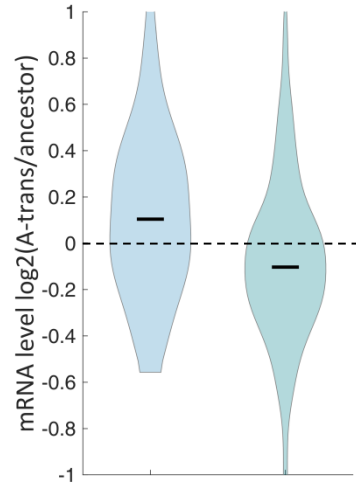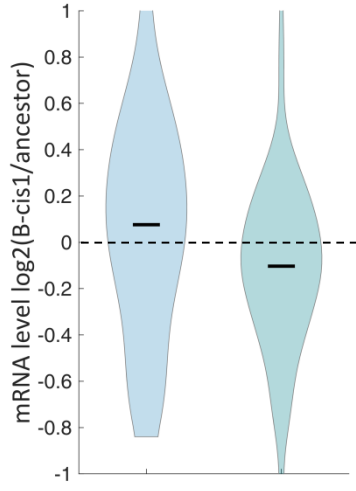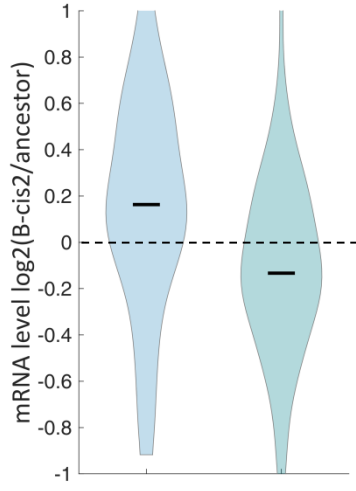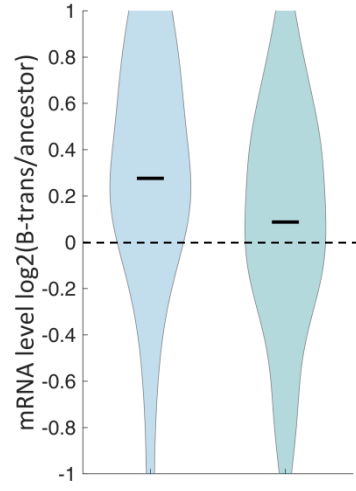

Supplement: pbio.3000423.s001.pdf [file pbio.3000423.s001.pdf]
