# Supplementary material for: Evolution of intron splicing towards optimized gene expression is based on various Cis- and Trans-molecular mechanisms
Source: PLoS Biol. 2019 Aug 23;17(8):e3000423. doi: 10.1371/journal.pbio.3000423 (PMC6728054; doi:10.1371/journal.pbio.3000423)
Supplement: S2 Table — (XLSX) [file pbio.3000423.s004.xlsx]

## Sheet: Sheet1
				Point-mutation table for trans-evolved colonies
				Strain Name	Chr	position	WT	mutation	gene	name	description
				A-trans	"cer_chr03	108171	"G"	"A"	YCL011C	GBP2	Poly(A+) RNA-binding protein; key surveillance factor for the selective export of spliced mRNAs from the nucleus to the cytoplasm; preference for intron-containing genes; similar to Npl3p; also binds single-stranded telomeric repeat sequence in vitro; relocalizes to the cytosol in response to hypoxia; GBP2 has a paralog, HRB1, that arose from the whole genome duplication
				A-trans	"cer_chr07	699447	"C"	"T"	YGR106C	VOA1	ER protein that functions in assembly of the V0 sector of V-ATPase; functions with other assembly factors; null mutation enhances the vacuolar ATPase (V-ATPase) deficiency of a vma21 mutant impaired in endoplasmic reticulum (ER) retrieval
				A-trans	"cer_chr12	1049797	"G"	"T"	YLR454W	FMP27	Putative protein of unknown function; the authentic, non-tagged protein is detected in highly purified mitochondria in high-throughput studies
				B-trans	"cer_chr04	1336736	"T"	"G"	YDR432W	NPL3	RNA-binding protein; promotes elongation, regulates termination, and carries poly(A) mRNA from nucleus to cytoplasm; represses translation initiation by binding eIF4G; required for pre-mRNA splicing; interacts with E3 ubiquitin ligase Bre1p, linking histone ubiquitination to mRNA processing; may have role in telomere maintenance; dissociation from mRNAs promoted by Mtr10p; phosphorylated by Sky1p…
				B-trans	"cer_chr14	712973	"T"	"A"	YNR052C	POP2	RNase of the DEDD superfamily; subunit of the Ccr4-Not complex that mediates 3' to 5' mRNA deadenylation
